# Supplementary material for: Will artificial intelligence challenge human in innovative works?-- A perspective in environmental research
Source: Research Square preprint supplement (doi:10.21203/rs.3.rs-8668775/v1), 2026-01-28
Supplement: Supplementary file 1 [file e74c1f5310ded656138d0d09.docx]

**Supplementary Information for**

**Will artificial intelligence challenge human in innovative works?-- A perspective in environmental research**

Yuxuan Chen1,2, Junyu Tao3,*, Guanyi Chen4, Beibei Yan1,5, Chao Chen1, Rui Liang1, Zhanjun Cheng1,5, Li’an Hou6,*

1 School of Environmental Science and Engineering, Tianjin University, Tianjin, 300350, China

2 Dalian Rubber & Plastics Machinery Co.Ltd, Dalian, 116036, China

3 National & Local Joint Engineering Research Center of Biomass Resource Utilization / College of Environmental Science and Engineering, Nankai University, Tianjin 300350, China

4 School of Mechanical Engineering, Tianjin University of Commerce, Tianjin 300134, China

5 Tianjin Key Lab of Biomass Wastes Utilization / Tianjin Engineering Research Center for Organic Wastes Safe Disposal and Energy Utilization, Tianjin 300350, China

6 School of Environment, Beijing Normal University, Beijing 100875, China

**Table of Contents**

[**Supplementary Note S1.** Step-by-Step Process 3](#_Toc173756767)

[**Supplementary Note S2.** Specific questions 4](#_Toc173756768)

[**Supplementary Note S3.** Dialogue example 7](#_Toc173756769)

[**Supplementary Table S1.** Comparison of top 20 keywords from 2000-2009, ChatGPT predictions for 2010-2019, and actual top 20 keywords for 2010-2019.9](#_Toc173756770)

[**Supplementary Table S2.** Comparison of top 20 words in abstract from 2000-2009, ChatGPT predictions for 2010-2019, and actual top 20 words in abstract from 2010-2019. 10](#_Toc173756771)

[**Supplementary Table S3.** Provided data: most frequent words from Title, Keywords and Abstract in 2000-2004. 12](#_Toc173756772)

[**Supplementary Table S4.** Title section: predictions for 2005-2009, 2010-2014, 2015-2019 13](#_Toc173756773)

[**Supplementary Table S5.** Keywords section: predictions for 2005-2009, 2010-2014, 2015-2019 14](#_Toc173756774)

[**Supplementary Table S6.** Abstract section: predictions for 2005-2009, 2010-2014, 2015-2019 16](#_Toc173756775)

[**Supplementary Table S7.** The prediction accuracy(%) and repetition(%) rate for different time periods. 17](#_Toc173756776)

[**Supplementary Table S8.** Abstract section: predictions for 2010-2019 usingdatafrom 2000-2009(no duplication) 17](#_Toc173756777)

[**Supplementary Table S9.** Predictions in 2020 to 2025: Title section 18](#_Toc173756778)

[**Supplementary Table S10.** Predictions in 2020 to 2025: Keywords section 19](#_Toc173756779)

[**Supplementary Table S11.** Predictions in 2020 to 2025: Abstract section 21](#_Toc173756780)

## Supplementary Note S1. Step-by-Step Process

1. Initial Setup: We begin by informing ChatGPT of our intention to use it for predictive analysis in environmental science, based on the information (i.e., the frequently occurring terms in ES&T articles) we provide. This step ensures that the AI model understands the context and purpose of the analysis.
2. Establishing Journal Familiarity: Next, we ask ChatGPT if it is familiar with the Environmental Science and Technology journal. This step is crucial as it establishes a foundation for the AI to comprehend the significance and scholarly value of the input data derived from ES&T publications. Understanding the source of the data helps in contextualizing the analysis and ensures that the predictions are grounded in the field’s academic standards.
3. Data Provision and Analysis: We then present ChatGPT with a selection of the identified key terms from specific years. The model is tasked with analyzing these terms, considering their historical context, frequency, and relevance in the broader field of environmental science.
4. Prediction of Future Terms: The final and most critical step involves asking ChatGPT to predict future key terms and topics that might emerge in the field of environmental field. The AI’s predictions are based on its analysis of the historical data, trends, and patterns observed in the ES&T literature.

## Supplementary Note S2. Specific questions

10-10(Using data from the first ten years to predict the next ten years):

Hi，I am a researcher in the field of the environment and I hope you can answer relevant questions in the field of the environment based on the information I provide.

Are you familiar with *Environmental Science & Technology*, one of the top journals in the Environmental Science and Engineering?

I analyzed ES&T articles and collected relevant data through bibliometric analysis. I will tell you the words that appeared the most frequently in title/keywords/abstract in EST from 2000 to 2009. Finally, you need to make predictions based on this information. The information I provide to you includes the top 20 words that appeared the most frequently in title/keywords/abstract in all literature from 2000 to 2009, as well as the number of times they appeared. Can you understand?

Now you know the words that have appeared the most frequently in title title/keywords/abstract in the literature from 2000 to 2009, please predict the top 20 words that will appear the most frequently in title/keywords/abstract in EST from 2010-2019.

5-15(Using data from the first five years to predict the next fifteen years):

Hi，I am a researcher in the field of the environment and I hope you can answer relevant questions in the field of the environment based on the information I provide.

Are you familiar with *Environmental Science & Technology*, one of the top journals in the Environmental Science and Engineering?

I analyzed ES&T articles and collected relevant data through bibliometric analysis. I will tell you the words that appeared the most frequently in title in ES&T from 2000 to 2004. Finally, you need to make predictions based on this information. The information I provide to you includes the top 20 words that appeared the most frequently in title/keywords/abstract in all literature from 2000 to 2004, as well as the number of times they appeared. can you understand?

Now you know the words that have appeared the most frequently in title in the literature from 2000 to 2004, please predict the top 20 words that will appear the most frequently in title/keywords/abstract in EST from 2005-2009.

please continue to predict the top 20 words that will appear the most frequently in title/keywords/abstract in EST from 2010-2014.

please continue to predict the top 20 words that will appear the most frequently in title/keywords/abstract in EST from 2015-2019.

4-1(Using data from the first four years to predict the next year):

Hi，I am a researcher in the field of the environment and I hope you can answer relevant questions in the field of the environment based on the information I provide.

Are you familiar with *Environmental Science & Technology*, one of the top journals in the Environmental Science and Engineering?

I analyzed ES&T articles and collected relevant data through bibliometric analysis. I will tell you the words that appeared the most frequently in title in ES&T from 2000 to 2003. Then, you need to make predictions based on this information. The information I provide to you includes the top 10 words that appeared the most frequently in title/keywords/abstract in all literature from 2000 to 2003, as well as the number of times they appeared. can you understand?

Now you know the words that have appeared the most frequently in title in the literature from 2000 to 2003, please predict the top 10 words that will appear the most frequently in title/keywords/abstract in ES&T in 2004 based on the information.

I will tell you the top 10 words that appeared the most frequently in title/keywords/abstract in ES&T from 2005 to 2008.

Please predict the top 10 words that will appear the most frequently in title/keywords/abstract in ES&T in 2009 based on the information.

I will tell you the top 10 words that appeared the most frequently in title/keywords/abstract in ES&T from 2010 to 2013.

Please predict the top 10 words that will appear the most frequently in title/keywords/abstract in ES&T in 2014 based on the information.

I will tell you the top 10 words that appeared the most frequently in title/keywords/abstract in ES&T from 2015 to 2018.

Please predict the top 10 words that will appear the most frequently in title/keywords/abstract in ES&T in 2019 based on the information.

There is an additional requirement for the comparative experiment: Requirement: Your predicted words must not be duplicated with the words I have provided to you, and must be brand new words.

Evaluating AI’s Predictive Power: The primary objective of this structured Q&A process is to evaluate whether ChatGPT can grasp shifts in research focuses and the evolving trajectory of environmental science based on past and present literature. Can it, based on the data it's provided, successfully forecast emerging themes and research directions? The effectiveness of ChatGPT in predicting future trends will not only demonstrate its utility in aiding environmental science research but also challenge our understanding of AI’s role in forecasting the evolution of academic disciplines.

## Supplementary Note S3. Dialogue example

The conversation between users and GPT can be viewed from the following link.

Title 10-10:

https://chatgpt.com/share/b3227aa0-f435-4234-9f95-71aefc479383

Keywords 10-10:

https://chatgpt.com/share/40a9479b-4373-4ec3-aac8-09d1d592eb77

Abstract 10-10:

https://chatgpt.com/share/7b081207-66dd-4651-b0aa-4d05607d682f

Title 4-1:

https://chatgpt.com/share/da77c8ba-45ff-4711-9cd7-c8467ee4aee3

Keywords 4-1:

https://chatgpt.com/share/91df8f2a-13e1-4b44-90da-4ba8b64a1321

Abstract 4-1:

<https://chatgpt.com/share/731fb573-f3df-46b7-b48b-70b37cb485ac>

Title 5-15:

https://chatgpt.com/share/2cdc9b70-7a5e-4831-b7ce-d64a7fbee266

Keywords 5-15:

https://chatgpt.com/share/00b9f696-2314-4c43-a8ce-70b5089650ca

Abstract 5-15:

https://chatgpt.com/share/448b8877-6e53-4532-9c42-8206ebc39bc8

No duplication:

Title 10-10

https://chatgpt.com/share/55153748-019a-4a39-a022-d25acbee90a7

Keywords 10-10:

https://chatgpt.com/share/9963fef6-71e4-45e0-ba3f-f2225e07cadc

Abstract 10-10:

https://chatgpt.com/share/7cfff82f-1677-4e6a-be3c-a815f7d356ce

Title 4-1:

https://chatgpt.com/share/d8dc8419-9838-4e80-abc4-0b609630c3fd

Keywords 4-1:

https://chatgpt.com/share/31da03d2-3de1-430e-970f-a480ba5dcee4

Abstract 4-1:

https://chatgpt.com/share/d896a5a3-4e38-4a98-b8f8-071c51e90b0a

Title 5-15:

https://chatgpt.com/share/d5efaf01-a173-4e10-bad3-368d7a7d4a88

Keywords 5-15:

https://chatgpt.com/share/c1fd5e50-9d07-4947-a915-a5cfffd7c22d

Abstract 5-15:

https://chatgpt.com/share/5c22a369-6d51-4f0f-af77-14280bb79689

## Supplementary Table S1. Comparison of top 20 keywords from 2000-2009, ChatGPT predictions for 2010-2019, and actual top 20 keywords for 2010-2019.

| 2000-2009 | Occurrence | Prediction for 2010-2019 | times | 2010-2019 | Occurrence |
| --- | --- | --- | --- | --- | --- |
| Water | 1008 | Climate Change | 10 | Water | 1243 |
| Adsorption | 662 | Renewable Energy | 10 | Toxicity | 729 |
| Degradation | 572 | Microplastics | 9 | Exposure | 719 |
| PAHs | 563 | Ecosystem Services | 7 | Oxidation | 705 |
| Kinetics | 525 | Environmental DNA | 7 | Adsorption | 656 |
| Sorption | 472 | Air Quality | 6 | Degradation | 655 |
| Oxidation | 433 | sustainability | 6 | Kinetics | 554 |
| Transport | 395 | Ecotoxicology | 6 | Waste-Water | 487 |
| Sediments | 195 | Biochar | 6 | Removal | 390 |
| PCBs | 172 | wastewater treatment | 5 | PAHs | 318 |
| Soil | 161 | endocrine disruptors | 5 | Transport | 284 |
| Removal | 134 | Fracking | 5 | Emissions | 215 |
| Model | 125 | Green Chemistry | 5 | Sorption | 181 |
| Emissions | 92 | Antibiotic Resistance | 4 | Model | 174 |
| Speciation | 87 | Nanomaterials | 4 | Drinking-Water | 127 |
| Exposure | 65 | Carbon Sequestration | 4 | Reduction | 64 |
| Toxicity | 62 | PFAS | 4 | Performance | 58 |
| Reduction | 53 | Nanotechnology | 3 | Speciation | 52 |
|  |  | Pharmaceuticals | 3 |  |  |
|  |  | Urbanization | 3 |  |  |

## Supplementary Table S2. Comparison of top 20 words in abstract from 2000-2009, ChatGPT predictions for 2010-2019, and actual top 20 words in abstract from 2010-2019.

| 2000-2009 | Occurrence | Prediction for 2010-2019 | Times | 2010-2019 | Occurrence |
| --- | --- | --- | --- | --- | --- |
| Reaction | 1323 | Climate | 10 | Emission | 2050 |
| Solution | 1159 | Renewable | 10 | Exposure | 1939 |
| Emission | 1103 | Carbon | 9 | Reaction | 1649 |
| Source | 913 | Microplastics | 9 | Surface | 1475 |
| Area | 820 | Sustainability | 9 | Year | 1326 |
| Surface | 792 | Mitigation | 8 | Oxidation | 1190 |
| Level | 774 | Biodiversity | 7 | Solution | 1141 |
| Sample | 664 | Photocatalysis | 7 | Presence | 853 |
| Formation | 577 | Adaptation | 5 | Formation | 778 |
| Oxidation | 454 | Greenhouse Gases | 5 | Removal | 731 |
| Exposure | 387 | Bioavailability | 5 | Region | 609 |
| Reduction | 365 | Ecosystem Services | 5 | Area | 516 |
| Year | 309 | Risk Assessment | 5 | Degradation | 240 |
| Removal | 305 | Nanoparticles | 4 | Interaction | 224 |
| Product | 291 | Ecosystem | 4 | Mechanism | 159 |
| Mechanism | 193 | Nanomaterials | 4 | Production | 144 |
| Efficiency | 166 | Biomonitoring | 4 | **Toxicity** | 130 |
| Presence | 158 | Ecotoxicology | 4 | Risk | 118 |
| Period | 148 | Policy | 4 | Structure | 109 |
| Metal | 124 | **Toxicity** | 3 | Performance | 107 |

## Supplementary Table S3. Provided data: most frequent words from Title, Keywords and Abstract in 2000-2004.

| Title | | Keywords | | Abstract | |
| --- | --- | --- | --- | --- | --- |
| 2000-2004 | occurrences | 2000-2004 | occurrences | 2000-2004 | occurrences |
| removal | 86 | water | 403 | reaction | 569 |
| assessment | 55 | adsorption | 261 | source | 513 |
| formation | 51 | PAHs | 242 | solution | 484 |
| iron | 47 | degradation | 224 | emission | 417 |
| development | 47 | kinetics | 222 | level | 319 |
| method | 39 | sorption | 209 | formation | 299 |
| reduction | 39 | sediments | 178 | product | 291 |
| reaction | 37 | transport | 159 | area | 253 |
| adsorption | 36 | oxidation | 125 | surface | 208 |
| measurement | 34 | soil | 111 | sample | 158 |
| environment | 31 | polychlorinated-biphenyls | 75 | period | 148 |
| use | 29 | removal | 43 | metal | 124 |
| sorption | 26 | model | 33 | reduction | 88 |
| characterization | 21 | emissions | 33 | mechanism | 85 |
| model | 21 | speciation | 31 | sediment | 85 |
| comparison | 19 |  |  | temperature | 81 |
| distribution | 18 |  |  | carbon | 72 |
| identification | 18 |  |  | treatment | 70 |
| mechanism | 18 |  |  | degradation | 68 |
| oxidation | 17 |  |  | difference | 65 |

## Supplementary Table S4. Title section: predictions for 2005-2009, 2010-2014, 2015-2019

| Predictions for 2005-2009 | Predictions for 2010-2014 | Predictions for 2015-2019 |
| --- | --- | --- |
| Climate | Climate Change | Microplastics |
| Carbon | Renewable Energy | Circular Economy |
| Sustainability | Microplastics | Renewable Energy |
| Microplastics | Urbanization | Ecotoxicology |
| Renewable Energy | Nanomaterials | Carbon Capture |
| Bioremediation | Fracking | Nanotechnology |
| Biodiversity | Water Security | Air Pollution |
| Renewable | Carbon Sequestration | Water Security |
| Green Chemistry | Ecosystem Services | Climate Change |
| Water | Biofuels | Sustainability |
| Toxicity | Air Quality | Sustainable Agriculture |
| Ecosystem | Endocrine Disruptors | Artificial Intelligence |
| Energy Efficiency | Sustainability | Energy Transition |
| Nanotechnology/Nanoparticles | E-waste | Environmental Genomics |
| Nanotechnology | Sustainable Development | Smart Cities |
| Energy | Fracking/Hydraulic Fracturing | Ocean Acidification |
| Water Quality | Green Chemistry | Ecosystem Services |
| Pollution | Biodiversity | Climate Change/Global Warming |
| Health | Ocean Acidification | Renewables |
| Risk Assessment | Biodiversity Loss | Sustainable Development |

## Supplementary Table S5. Keywords section: predictions for 2005-2009, 2010-2014, 2015-2019

| Predictions for 2005-2009 | Predictions for 2010-2014 | Predictions for 2015-2019 |
| --- | --- | --- |
| Climate Change | Sustainable Agriculture | Circular Economy |
| Nanotechnology | Greenhouse Gas Emissions | Renewable Energy Integration |
| Carbon Sequestration | Nanomaterials | Microplastics |
| Renewable Energy | Ocean Acidification | Climate Change Mitigation |
| Microplastics | Environmental DNA | Urban Sustainability |
| Green Chemistry | Climate Change Adaptation | Artificial Intelligence in Environmental Science |
| Environmental Policy | Fracking | Environmental Genomics |
| Endocrine Disruptors | Renewable Energy Sources | Water Reuse and Recycling |
| Heavy Metals | Carbon Footprint | PFAS |
| Sustainable Development | Energy Efficiency | Environmental DNA |
| Ecosystem Services | Smart Grids | Environmental Risk Assessment |
| Biodiversity | Environmental Genomics | Soil Health |
| Biomonitoring | Water Security | Green Infrastructure |
| Environmental Risk Assessment | Biofuels | Green Building Materials |
| Water Treatment | Climate Change Mitigation | Energy Storage |
| Biofuels | Fracking | Environmental Justice |
| E-Waste | Air Pollution and Health | Zero Waste |
| Air Quality | Environmental Justice | Environmental Policy and Governance |
| Bioremediation | Biochar | Climate Change Adaptation |
| Waste Management | Emerging Contaminants | Sustainable Urban Development |

## Supplementary Table S6. Abstract section: predictions for 2005-2009, 2010-2014, 2015-2019

| Predictions for 2005-2009 | Predictions for 2010-2014 | Predictions for 2015-2019 |
| --- | --- | --- |
| Climate | Climate Change | Circular Economy |
| Water | Fracking | Ecosystem Services |
| Biodiversity | Renewable Energy | Climate Change |
| Renewable | Air Quality | Microplastics |
| Energy | Environmental Policy | Biodiversity |
| Sustainability | Biofuels | Sustainability |
| Carbon | Ecotoxicology | Renewable Energy |
| Pollution | Green Chemistry | Air Quality |
| Ecosystem | Microplastics | Water Security |
| Monitoring | Carbon Sequestration | Green Technology |
| Toxicity | Sustainability | Smart Cities |
| Nanoparticles | Ecosystem Services | Carbon Footprint |
| Nanotechnology | Urbanization | Ocean Acidification |
| Greenhouse | Nanotechnology | Environmental Policy |
| Modeling | Biodiversity Loss | Greenhouse Gases |
| Soil | Water Security | Climate Resilience |
| Atmosphere | Carbon Footprint | Microbiome |
| Emission | Nanomaterials | Green Chemistry |
| Greenhouse gases | Water Quality | Carbon Capture |
| Carbon Sequestration | Photovoltaics | Energy Storage |

## Supplementary Table S7. The prediction accuracy(%) and repetition(%) rate for different time periods.

| Terms  Period | Title | | Keywords | | Abstract | |
| --- | --- | --- | --- | --- | --- | --- |
| accuracy | repetition | accuracy | repetition | accuracy | repetition |
| 2004 | 30 | 100 | 20 | 20 | 70 | 100 |
| 2009 | 20 | 90 | 30 | 40 | 50 | 100 |
| 2014 | 40 | 80 | 30 | 40 | 80 | 100 |
| 2019 | 30 | 80 | 50 | 50 | 80 | 100 |

## Supplementary Table S8. Abstract section: predictions for 2010-2019 using data from 2000-2009(no duplication)

| 2000-2009 | Occurrence | Prediction for 2010-2019 | Times | 2010-2019 | Occurrence |
| --- | --- | --- | --- | --- | --- |
| Reaction | 1323 | Climate | 10 | Emission | 2050 |
| Solution | 1159 | Carbon | 10 | Exposure | 1939 |
| Emission | 1103 | Renewable | 10 | Reaction | 1649 |
| Source | 913 | Sustainability | 10 | Surface | 1475 |
| Area | 820 | Biodiversity | 10 | Year | 1326 |
| Surface | 792 | Microplastics | 9 | Oxidation | 1190 |
| Level | 774 | Greenhouse | 9 | Solution | 1141 |
| Sample | 664 | Ecosystem | 9 | Presence | 853 |
| Formation | 577 | Nanoparticles | 7 | Formation | 778 |
| Oxidation | 454 | Biodegradation | 7 | Removal | 731 |
| Exposure | 387 | Photocatalysis | 7 | Region | 609 |
| Reduction | 365 | Mitigation | 6 | Area | 516 |
| Year | 309 | Nanomaterials | 5 | Degradation | 240 |
| Removal | 305 | Energy | 4 | Interaction | 224 |
| Product | 291 | Sensors | 4 | Mechanism | 159 |
| Mechanism | 193 | Bioaccumulation | 4 | Production | 144 |
| Efficiency | 166 | Wastewater | 4 | **Toxicity** | 130 |
| Presence | 158 | Genomics | 3 | Risk | 118 |
| Period | 148 | **Toxicity** | **3** | Structure | 109 |
| Metal | 124 | Adaptation | 3 | Performance | 107 |

## Supplementary Table S9. Predictions in 2020 to 2025: Title section

| **2020** | **2021** | **2022** | **2023** | **2024** | **2025** |
| --- | --- | --- | --- | --- | --- |
| Microplastics | COVID-19 | Microplastics | Circular Economy | Circular Economy | Climate Resilience |
| Climate | Microplastics | Sustainability | Microplastics | Sustainability | Ecosystem Services |
| PFAS | Air Quality | Decarbonization | Biodiversity | Microplastics | Climate Solutions |
| Sustainability | Renewables | Climate Change | Carbon Capture | Biodiversity | Carbon Neutrality |
| Nanomaterials | Plastics | Renewables | Sustainability | Decarbonization | Energy Transition |
| Renewable | Sustainability | Climate | Environmental Justice | Renewable Energy | Water Security |
| Biochar | Biodiversity | Circular Economy | Climate | Water Security | Water Reclamation |
| Air Quality | Climate | Air Quality | Climate Resilience | Climate | Sustainable Agriculture |
| Response | Remote Sensing | Biodiversity | Biochar | Ecosystem Services | Climate |
| Removal | Response | Net Zero | Water Security | Climate Resilience | Sustainability |

## Supplementary Table S10. Predictions in 2020 to 2025: Keywords section

| **2020** | **2021** | **2022** | **2023** | **2024** | **2025** |
| --- | --- | --- | --- | --- | --- |
| Microplastics | Environmental Justice | Circular Economy | Climate Adaptation | Water Security | Regenerative Agriculture |
| PFAS | Green Chemistry | Microplastics | Microplastics | Climate Change Adaptation | Water Security |
| Climate Change | COVID-19 | Sustainable Agriculture | Carbon Capture and Storage | Carbon Neutrality | Blue Economy |
| Renewable Energy | PFAS | Water | Circular Economy | Net-zero Emissions | Digital Environmental Monitoring |
| Wastewater Treatment | Water | Climate Resilience | Emerging Contaminants | Climate Resilience | Climate Engineering |
| Circular Economy | Environment | Renewable Energy Integration | Water | Renewable Energy Optimization | Climate Resilience |
| Antibiotic Resistance | Microplastics | Biodiversity Conservation | Climate Resilience | Renewable Energy Integration | Smart Cities |
| Air Quality | Plastics and Microplastics | Net Zero Emissions | Climate Change Solutions | Ecosystem Services | Energy Transition |
| Nanotechnology | Climate Change Mitigation | Climate Change Mitigation | Ecosystem Restoration | Biodiversity Conservation | Biodiversity Conservation |
| Water | Circular Economy | Energy Transition | Energy Transition | Green Energy Storage | Ecosystem Restoration |

## Supplementary Table S11. Predictions in 2020 to 2025: Abstract section

| **2020** | **2021** | **2022** | **2023** | **2024** | **2025** |
| --- | --- | --- | --- | --- | --- |
| Microplastics | Air Quality | Microplastics | Biodiversity | Circular Economy | Water Security |
| Climate | Decarbonization | Biodiversity | Microplastics | Climate Resilience | Green Infrastructure |
| Renewable | Remote Sensing | Sustainability | Circular Economy | Energy Transition | Biodiversity Conservation |
| Nanomaterials | Climate | Circular Economy | Decarbonization | Ecosystem Services | Climate Adaptation |
| Biodiversity | Plastics | Environmental Justice | Renewable Energy | Microplastics | Climate Mitigation |
| Mitigation | Microplastics | Climate Change | PFAS | Nanoremediation | Circular Economy |
| Sustainability | Sustainability | Renewables | Climate | Water Reuse | Zero-Waste |
| Carbon | Emission | Climate | Carbon Capture | Climate Adaptation | Sustainable Agriculture |
| Emission | COVID-19 | Emission | Emission | Decarbonization | Ecosystem Services |
| Exposure | Exposure | Net Zero | Sustainable Development | Net-Zero | Climate Resilience |
